# Reactive fungal insoles

Anna Nikolaidou<sup>\*a,b</sup>, Neil Phillips<sup>a</sup>, Michail-Antisthenis Tsompanas<sup>a</sup>,  
Andrew Adamatzky<sup>a</sup>

<sup>a</sup>*Unconventional Computing Laboratory, UWE, Bristol, UK*

<sup>b</sup>*Department of Architecture, UWE, Bristol, UK*

---

## Abstract

Mycelium bound composites are promising materials for a diverse range of applications including wearables and building elements. Their functionality surpasses some of the capabilities of traditionally passive materials, such as synthetic fibres, reconstituted cellulose fibres and natural fibres. Thereby, creating novel propositions including augmented functionality (sensory) and aesthetic (personal fashion). Biomaterials can offer multiple modal sensing capability such as mechanical loading (compressive and tensile) and moisture content. To assess the sensing potential of fungal insoles we undertook laboratory experiments on electrical response of bespoke insoles made from capillary matting colonised with oyster fungi *Pleurotus ostreatus* to compressive stress which mimics human loading when standing and walking. We have shown changes in electrical activity with compressive loading. The results advance the development of intelligent sensing insoles which are a building block towards more generic reactive fungal wearables. Using Fitzhugh-Nagumo model we numerically illustrated how excitation wave-fronts behave in a mycelium network colonising an insole and shown that it may be possible to discern pressure points from the mycelium electrical activity.

*Keywords:* biosensor, fungi, smart wearables, medical diagnosis

---

## 1. Introduction

In-shoe sensor technologies have been widely used in the clinical domain for disease detection, diagnostics and therapeutic use. Smart insoles can detect impairments in balance, gait, posture, muscle strength and cognition,

---

\*Corresponding author; Email: [anna.nikolaidou@uwe.ac.uk](mailto:anna.nikolaidou@uwe.ac.uk)

providing valuable information about the user's physical and mental health. They most commonly integrate pressure or optical sensor technologies in relevant locations for monitoring the foot-ground interaction force [18], providing complex functions and exhibiting broad sensing range when exposed to mechanical stimuli. Smart insoles can be divided into three subgroups: (1) passive smart insoles able to sense parameters including weight loading of user, local terrain topology, volatile organic compounds, (2) active or reactive smart insoles able to sense and react performing some actions, by integrating an actuator, (3) advanced smart insoles able to sense, react and tailor their behaviour to specific operating circumstances.

Integrating sensor technologies into insoles, patterns and strategies for executing different functional tasks can be assessed, capturing data that can form the basis for use in areas such as rehabilitation, prehabilitation, monitoring elderly people who have mobility problems, mitigating slipping and falling as well as assessing long-term chronic conditions such as Dementia, Parkinson's disease and stroke [19]. For example, smart insoles have been used for the measurement of the weight pressure distribution that a patient exerts on each foot, in addition to the gait time, swing time, and stance time of each leg while walking to diagnose several medical conditions [13].

Smart insoles have lately found new applications outside the clinical domain. The proliferation of consumer-grade smart wearables has further propelled the development of commercial in-shoe devices to assess health and wellness-related mobility parameters in activities of daily living [22], [24], [34], [25] e.g., pressure mapping of insoles in footwear based on conventional sensor technology (e.g. dielectric layer) have been reported [30, 8] and insoles with diagnostic capabilities are commercially available, for example NURVV Run Smart Insoles [15]. While the use of smart insoles in non-medical applications has recently attracted significant interest, there are important challenges to overcome.

Cost represents a limiting factor. The devices require a number of sensors and actuators driven by electrical circuit components, usually supplied by a battery, making them not only expensive to fabricate but also significantly contributing to the depletion of natural resources. Insoles based on conventional sensor technology have short battery life (e.g. 5 h [17]) and are available in a limited number of insole sizes/shapes (e.g. 6 sizes [16]). Moreover, the performance of smart insoles is directly linked to the number and distribution of the sensors integrated as well as the identification of optimal sensor locations that match areas subject to the highest plantar pressures

during gait or standing. These locations can vary depending on the foot sizes and gait patterns of different users and can therefore alter or limit the gait or standing event recognition accuracy. Finally, high sensor responsivity which is the fundamental indicator to ensure a prompt real-time detection of specific biomechanically-relevant gait and standing events and a timely and synchronous action of the linked wearable device, multiple sensor signals as well as information related to the interaction with the external environment are necessary but not always achievable.

Biomaterials, such as mycelium bound composites, present a promising alternative to conventional smart insoles. They exhibit sensing and responsive capabilities without requiring additional space (for support infrastructure) and external inputs (e.g., electrical power sources) to operate, using its own bioelectric activity. Fungal sensors offer increased biodegradability, they are self-sustainable as they can self-grow, self-repair and self-assemble, they are abundant and offer in situ low technology cultivation. Moreover, they present low capital requirements and are easily scalable for the production of customised insole sizes.

In our previous studies, we demonstrated that living blocks of colonised by filamentous polypore fungus *Ganoderma resinaceum* substrate (MOGU's collection code 19-18, Mogu S.r.l., Inarzo, Italy), showed immediate responses in the form of spikes of electrical potential when subjected to weight application (8 kg and 16 kg), recognising the application or removal of weight [2]. In this paper, we present an illustrative scoping study in which we research the response of mycelium composite insoles to pressure generated by the feet during gait or standing. The primary objective of the studies reported in this paper is to assess the performance and spiking activity of the fungal insoles when exposed to mechanical stimuli and in particular, weight shifting (shifting of weight from toe to heel). We present a prototype of pressure-sensitive fungal insoles, aiming to open up opportunities for further research and discussions on the novel field of responsive smart insoles from living material, with the objective of enabling real-time applications and providing a sustainable, cost efficient and accurate tool for posture, gait and activity recognition events.

The rest of the paper is organised as follows: Section 2 presents the experimental setup and details of the analysis. Along with the simulation analysis, the results of the electrical analysis are reported. Experimental results are discussed in Section 3. The discussion is given in Section 4. Finally, the paper is concluded in Section 5.

## 2. Methods

An innovative new method of forming insoles colonised with fungi from capillary matting (rather than hemp) was developed through multiple iterations. 200 g slab of mixed (mostly Rye grain) seed substrate well colonised with *Pleurotus ostreatus* (Ann Miller's Speciality Mushrooms, UK, <https://www.annforfungi.co.uk/shop/oyster-grain-spawn/>) was placed in the bottom of clean plastic container (51, 280 x 145 x 110 mm, Amazon, UK). Multi-layered, absorbent, capillary action matting, ~3 mm thickness, made from bonded, non-toxic, wool and acrylic fibres, 450 g m<sup>-2</sup> (manufactured by Tech-Garden, UK) was manually cut into the shape of insoles (UK ladies size 10) using hemp scissors (manufactured by Pemmiproducts, Germany), see Fig. 1a. The bespoke insole was sprayed with deionized water (15 MΩ cm, model Essential, Millipore, UK) and placed on spawn bed, see Fig. 1b. The plastic container was placed inside a polypropylene bag (type 14A) fitted with 0.5 μm air filter patch (Ann Miller's Speciality Mushrooms, UK) and sealed with food storage clip (model Bevara, IKEA, UK). The insole was kept at ambient room temperature 18 °C to 22 °C inside a growth tent (in darkness). The insole was checked for growth every 3 days and additional moisture added (via manual water spray bottle) as required. After c. 3 weeks, uniform mycelium growth throughout the capillary matting was observed, see Fig. 1b. The colonised insole was carefully lifted off the spawn bed, see Fig. 1c.

A bespoke test rig was developed to apply compressive loading to insoles to replicate the weight of a human when walking and standing. A prosthetic foot (ladies, UK size 10) was 3D printed in acrylonitrile butadiene styrene (with Ultimaker S5, UK), see Fig. 2. The top part of the prosthetic foot was intentionally printed flat. A pivot joint (with integrated locking mechanism) was positioned between the weight and aluminium plate on top of the prosthetic foot to provide control over how the compressive load was distributed across the insole, see Fig. 2(b). Test rig frame was assembled from plywood sheet (18 mm thickness) with plastic pipe (110 mm diameter). Mild steel bar (100 mm diameter) was free to move vertically inside the pipe to provide compressive loading on the insole at the bottom. For example, 500 mm length of steel bar weighs 37 kg which approximates a woman (with size 10 feet) standing on two feet (two 500 mm lengths can be used to replicate standing on one foot). The weight(s) could be raised and locked in the retracted position (by manual winch, fitted with a ratchet locking mechanism) to enable

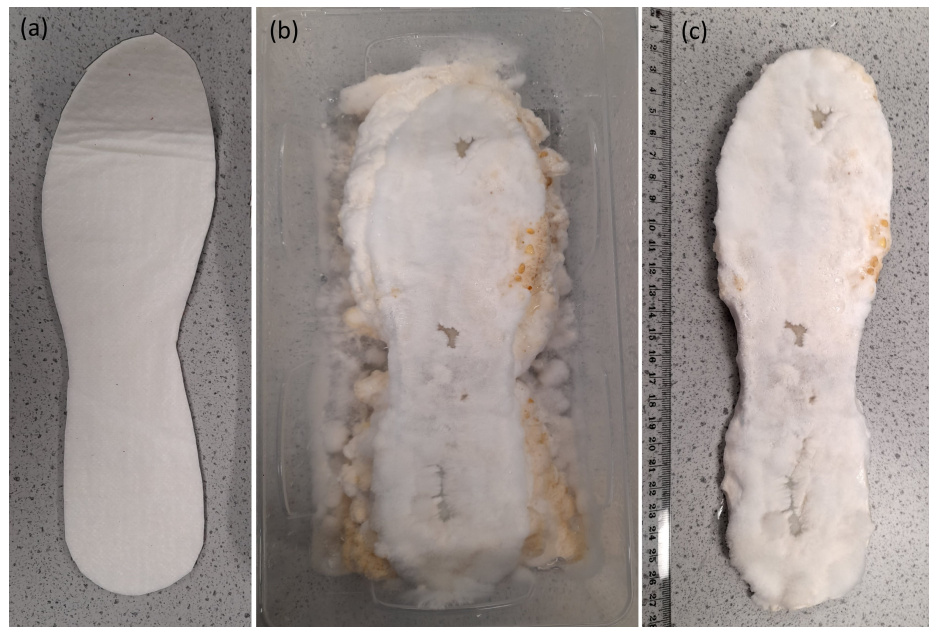

Figure 1: (a) capillary matting cut into insole pattern (b) insole on bed of spawn (c) well colonised insole

insoles to be interchanged and the load varied. To prevent the colonised insole slowly dehydrating over time (which might affect measurements) a sheet of capillary matting was placed under the insole, see Fig. 2(a). The end of the capillary matting was left in a tray of de-ionised water which provided a source of moisture.

Three modes of compressive loading were explored (i) toe bias, Fig. 2(d) (ii) heel bias, Fig. 2(c) and (iii) uniformly distributed, Fig. 2(b).

Electrical activity of the mycelium colonising insoles was recorded using eight pairs of stainless steel sub-dermal needle electrodes (Spes Medica S.r.l., Italy), with twisted cables and ADC-24 (PICO Technology, UK) high-resolution data logger with a 24-bit A/D converter, galvanic isolation and software-selectable sample rates. The pairs of electrodes were pierced through the insole's edge as shown in Fig. 2. We recorded electrical activity one sample per second. During the recording, the logger has been doing as many measurements as possible (typically up to 10 per second) and saving the average value. We set the acquisition voltage range to 156 mV. Each pair of electrodes, called a channel (Ch), reported a difference of the electrical potential between the electrodes. Distance between electrodes was 1 cm to 2 cm.

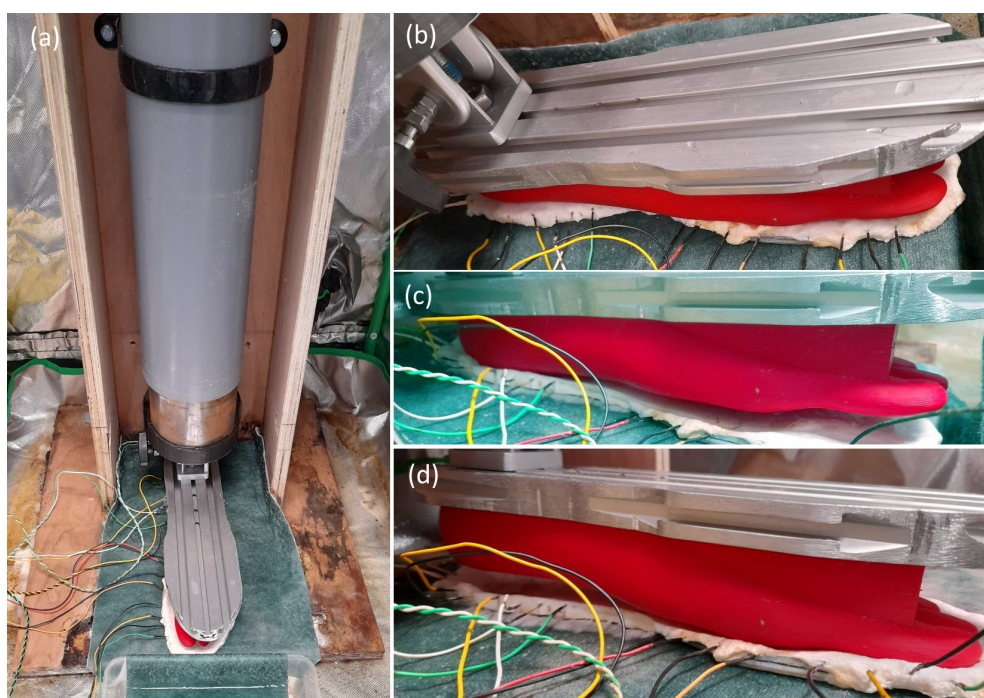

Figure 2: Bespoke insole test rig (a) setup inside growth tent (b) weight uniformly distributed via pivot joint on prosthetic foot (c) heel bias (d) toes bias.

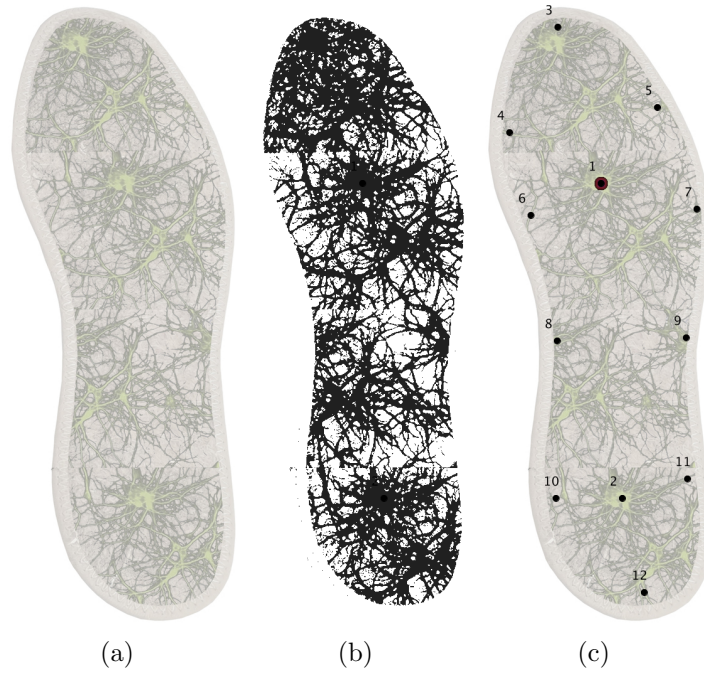

Figure 3: Image of the fungal colony,  $1000 \times 960$  pixels used as a template conductive for FHN. (a) Original image, mycelium is seen as green pixels. (b) Conductive matrix  $C$ , conductive pixels are black. (c) Configuration of electrodes.

Numerical modelling of the electrical activity was implemented as follows.

We used an artistic image of the mycelium network (Fig. 3a) projected onto a  $364 \times 985$  nodes grid. The original image  $M = (m_{ij})_{1 \leq j \leq n_i, 1 \leq j \leq n_j}$ ,  $m_{ij} \in \{r_{ij}, g_{ij}, b_{ij}\}$ , where  $n_i = 364$  and  $n_j = 985$ , and  $1 \leq r, g, b \leq 255$  (Fig. 3a), was converted to a conductive matrix  $C = (m_{ij})_{1 \leq i, j \leq n}$  (Fig. 3b) derived from the image as follows:  $m_{ij} = 1$  if  $r_{ij} > 170$ ,  $g_{ij} > 170$  and  $b_{ij} < 200$ ; a dilution operation was applied to  $C$ .

FitzHugh-Nagumo (FHN) equations [9, 20, 23] is a qualitative approximation of the Hodgkin-Huxley model [5] of electrical activity of living cells:

$$\frac{\partial v}{\partial t} = c_1 u(u - a)(1 - u) - c_2 uv + I + D_u \nabla^2 \quad (1)$$

$$\frac{\partial v}{\partial t} = b(u - v), \quad (2)$$

where  $u$  is a value of a trans-membrane potential,  $v$  a variable accountable

for a total slow ionic current, or a recovery variable responsible for a slow negative feedback,  $I$  is a value of an external stimulation current. The current through intra-cellular spaces is approximated by  $D_u \nabla^2$ , where  $D_u$  is a conductance. Detailed explanations of the ‘mechanics’ of the model are provided in [26], here we shortly repeat some insights. The term  $D_u \nabla^2 u$  governs a passive spread of the current. The terms  $c_2 u(u - a)(1 - u)$  and  $b(u - v)$  describe the ionic currents. The term  $u(u - a)(1 - u)$  has two stable fixed points  $u = 0$  and  $u = 1$  and one unstable point  $u = a$ , where  $a$  is a threshold of an excitation.

We integrated the system using the Euler method with the five-node Laplace operator, a time step  $\Delta t = 0.015$  and a grid point spacing  $\Delta x = 2$ , while other parameters were  $D_u = 1$ ,  $a = 0.13$ ,  $b = 0.013$ ,  $c_1 = 0.26$ . We controlled excitability of the medium by varying  $c_2$  from 0.05 (fully excitable) to 0.015 (non excitable). Boundaries are considered to be impermeable:  $\partial u / \partial \mathbf{n} = 0$ , where  $\mathbf{n}$  is a vector normal to the boundary.

To record dynamics of excitation in the network, as if in laboratory experiments, we simulated electrodes by calculating a potential  $p_x^t$  at an electrode location  $x$  as  $p_x = \sum_{y:|x-y|<2} (u_x - v_x)$ . Configuration of electrodes  $1, \dots, 16$  is shown in Fig. 3c.

To imitate a pressure onto insole we perturbed the medium around electrodes  $E_1$  or  $E_2$  or both.

Time-lapse snapshots provided in the paper were recorded at every 100<sup>th</sup> time step, and we display sites with  $u > 0.04$ ; videos and figures were produced by saving a frame of the simulation every 100<sup>th</sup> step of the numerical integration and assembling the saved frames into the video with a play rate of 30 fps. Videos are available at <https://doi.org/10.5281/zenodo.5091807>.

### 3. Results

Electrical activity was recorded for  $\sim 30$  min immediately before,  $\sim 30$  min during and  $\sim 30$  min immediately after 35 kg was evenly distributed across the insole, see Fig. 4.

Electrical activity was recorded for  $\sim 24$  h immediately before 35 kg was evenly distributed across the insole for  $\sim 72$  h. The prosthetic foot was then tilted back to bias the weight onto the heel region of the insole for  $\sim 24$  h. The prosthetic foot was then tilted forward to bias the weight onto the toe region of the insole for  $\sim 24$  h. Finally, the weight was removed for  $\sim 24$  h.



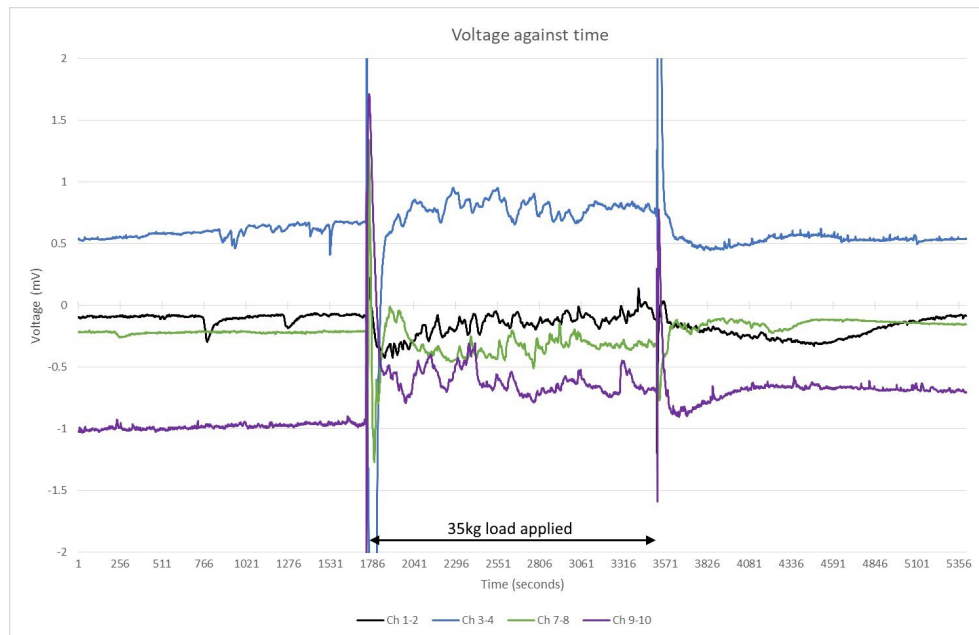

Figure 4: Electrical activity (recorded on Ch 1-2, Ch 3-4, Ch 7-8, Ch 9-10) before, during and after load (35kg) was evenly distributed across insole.

Eight pairs of needle electrodes were distributed along the side of the insole as shown in Fig. 5.

When a small area, c. 10 nodes, is perturbed the excitation starts propagating along the simulated mycelium network (Fig. 6ab). With time, typically after 50K-60K iterations of the integration, the excitation wave fronts span all the mycelium network (Fig. 6cde). Due to inhomogeneity of the network source so the spiral waves are formed. They become sources of oscillatory excitations. Repeated propagation of the spiral waves is reflected in the oscillatory activity levels on the mycelium network (Fig. 7).

Is it possible to discern what loci of the insole a pressure was applied based on electrical activity of the mycelium network? Yes, as we demonstrate further. Let us start with activity. As evidenced in Fig. 7 the overall activity of the mycelium network depends on the site of pressure application (as imitated via exciting areas around electrodes  $E_1$  or  $E_2$  or both). When consider the three possible scenarios of the stimulation, the overall activity is lowest when area around electrode  $E_2$  is excited ( $E_1 = 0, E_2 = 1$ ). This is due to relatively lower number of mycelium strands in that part of the insole.

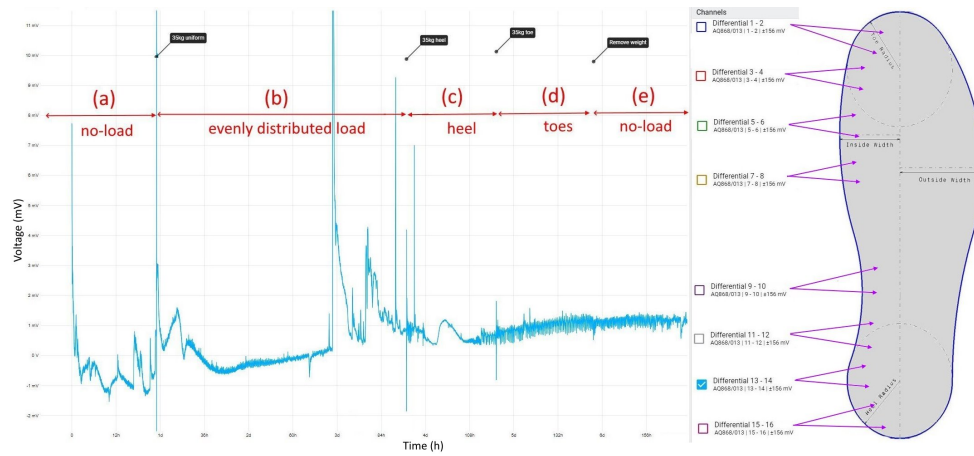

Figure 5: Exemplar of electrical activity recorded on Ch 13-14 (a) no load (b) load (35 kg) evenly distributed (c) load biased on heel region (d) load biased on toe region (e) no load.

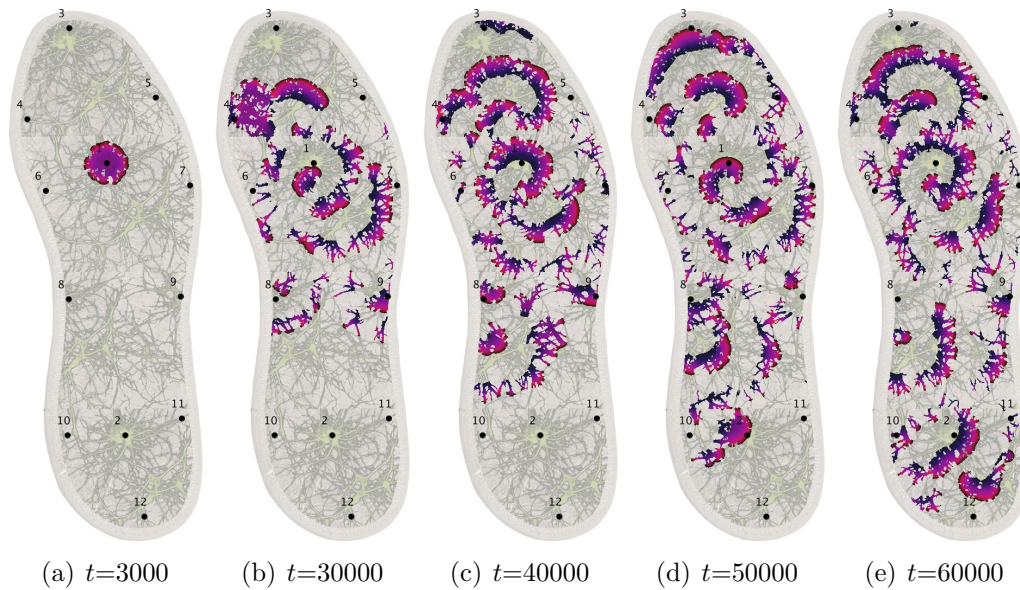

Figure 6: Snapshots of the excitation dynamics of the mycelium network colonising the insole. Area around electrode  $E_1$  has been excited originally.

The overall activity increases in the scenario where area round  $E_1$  is excited ( $E_1 = 1, E_2 = 0$ ). And the highest level of overall activity is evidenced for the scenario when areas around both electrodes ( $E_1 = 1, E_2 = 1$ ).

Coverage frequency could be another indicator to discern geometry of

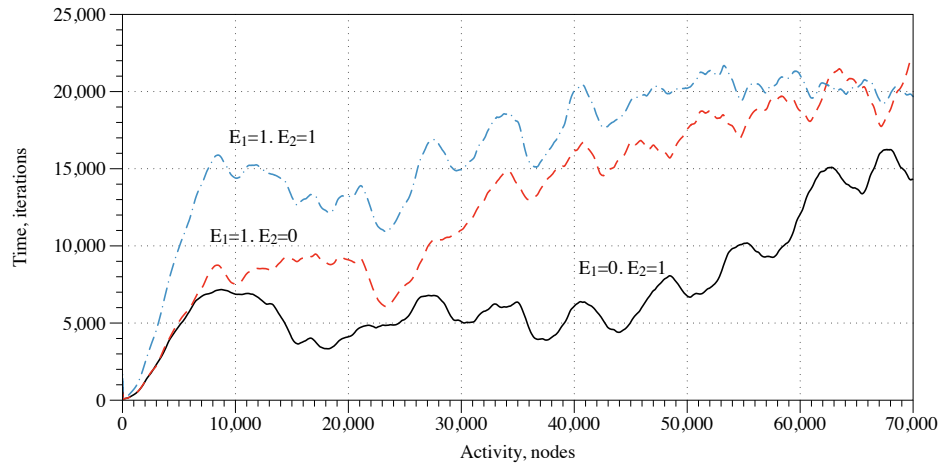

Figure 7: Activity of the mycelium network, for initial scenarios of excitation around electrode  $E_2$ , solid black,  $E_1$ , dashed red,  $E_1$  and  $E_2$ , dot-dashed blue. The activity is measured in a number of nodes  $x$  with  $u_x > 0.1$ .

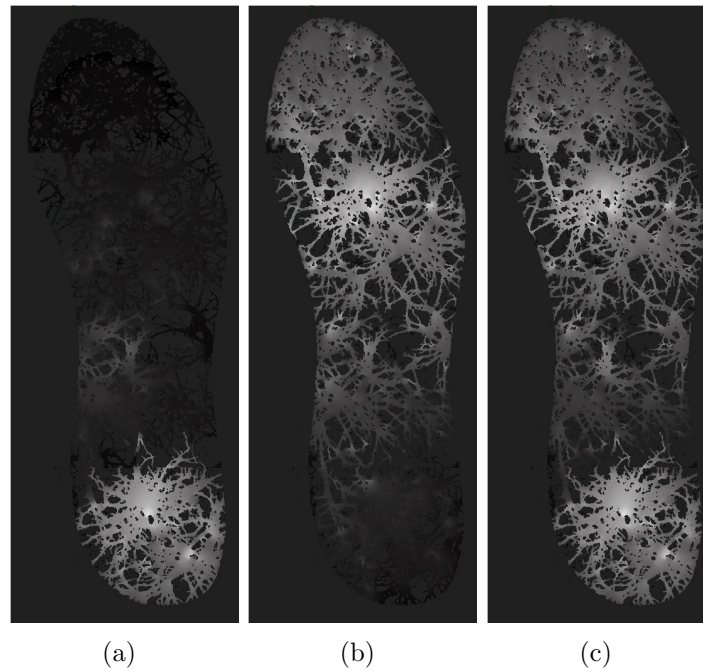

Figure 8: Coverage frequency, expressed in gradation of black. Areas never covered by excitation wave-fronts are black, areas covered most frequently are white. (a) Area around electrode  $E_2$  have been excited initially. (b) Area around electrode  $E_1$  have been excited initially. (c) Areas around electrodes  $E_1$  and  $E_2$  have been excited initially.

| spikes                                                                            | gate    | notations    |
|-----------------------------------------------------------------------------------|---------|--------------|
|  | OR      | $x + y$      |
|  | SELECT  | $y$          |
|  | XOR     | $x \oplus y$ |
|  | SELECT  | $x$          |
|  | NOT-AND | $\bar{x}y$   |
|  | AND-NOT | $x\bar{y}$   |
|  | AND     | $xy$         |

Table 1: Representation of gates by combinations of spikes. Black lines show the potential when the network was stimulated by input pair (01), red by (10) and green by (11). Adamatzky proposed this representation originally in [3].

pressure. A coverage frequency at node  $x$  is a number of iterations values of excitation variable  $u_x$  exceeded 0.1, normalised by maximum coverage frequency amongst the nodes. The coverage frequency is illustrated in Fig. 8. The coverage frequency is maximum around the areas of pressure application and might even reflect a distance, not an Euclidean distance but a distance in the propagation metric of the mycelium networks, from the pressure application site.

A third measure applied to discern geometry of pressure would be spiking activity recorded on the electrodes. Examples of the spiking for all three scenarios of pressure application are shown in Fig. 9. The patterns of spiking activities might give us unique representations of the geometries of pressure applications. The formal representation of the spiking patterns could be done by distributions of Boolean gates in the spiking activity. This original technique has been developed by us in frameworks of cytoskeleton networks [3], fungal colony [4] and ensemble of proteinoid microspheres [1].

A spiking activity of the mycelium network shown in Fig. 9 in a response to stimulation, i.e. application of inputs  $(E_1, E_2) = \{(0, 1), (1, 0), (1, 1)\}$  via impulses at the electrodes  $E_1$  and  $E_2$ , recorded from electrodes  $E_1, \dots, E_{12}$ . We assume that each spike represents logical TRUE and that spikes occurring within less than  $2 \cdot 10^2$  iterations are simultaneous. Then a representation of gates by spikes and their combinations can be implemented as shown in Tab. 1. By selecting specific intervals of recordings we can realise several gates in a single site of recording. In this particular case we assumed that

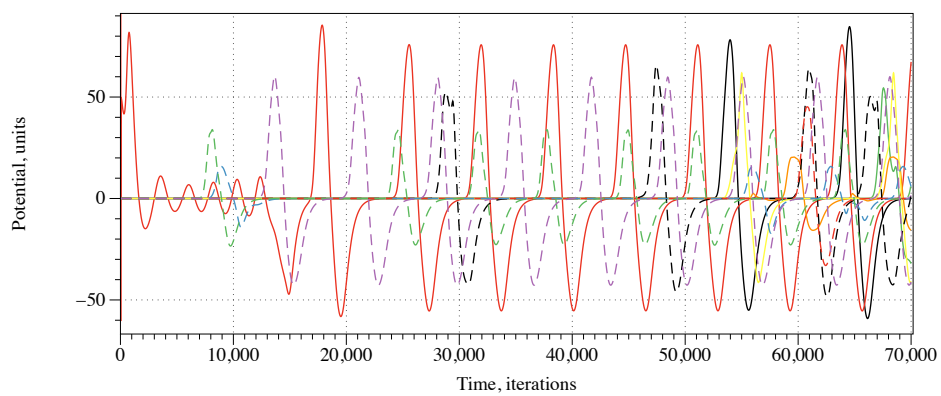

(a)

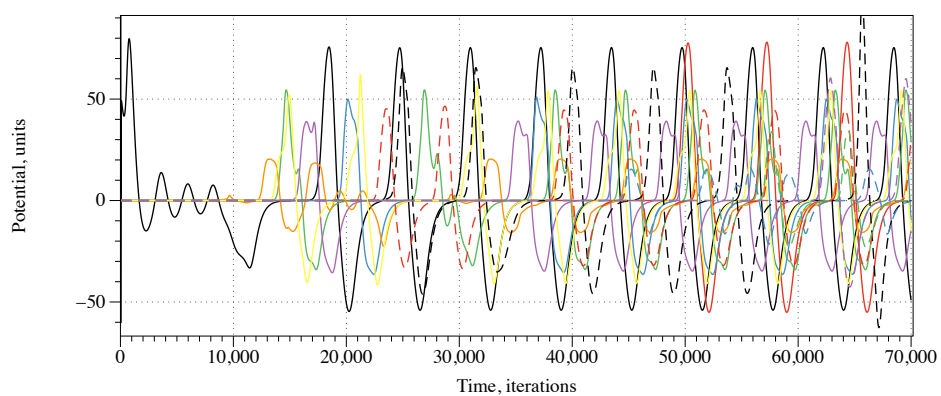

(b)

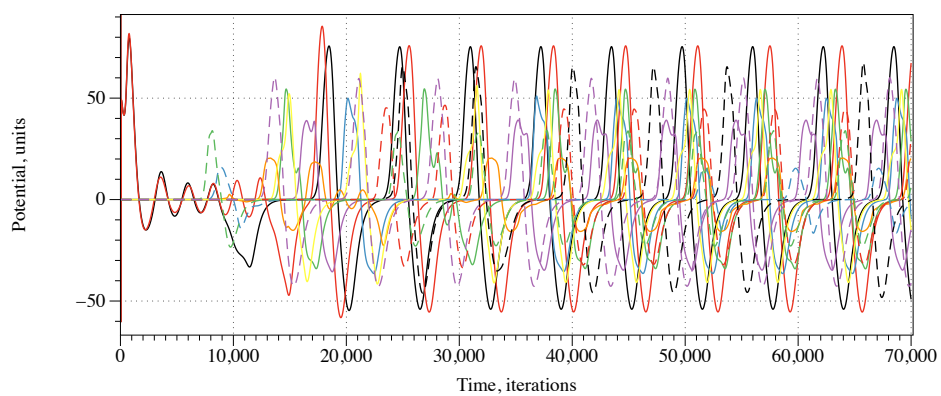

(c)

Figure 9: Potential recorded on electrodes  $E_1, \dots, E_{12}$  for initial scenarios of excitation around electrode (a)  $E_2$ , (b)  $E_1$ , (c)  $E_1$  and  $E_2$ .

spikes are separated if their occurrences are more than  $10^3$  iterations apart. In the simulated scenarios, we found that the following Boolean functions can be implemented on the electrodes  $E_1, \dots, E_{12}$ . Three OR gates are realised on electrodes  $E_3, E_8$  and  $E_{12}$ . Ten `SELECT $y$` , where  $y=\text{TRUE}$  signifies initial excitation around electrode  $E_2$ , are realised on electrodes  $E_3$  and  $E_{12}$ . Fifty `SELECT $x$` , where  $x=\text{TRUE}$  signifies initial excitation around electrode  $E_1$ , are realised on the electrodes but  $E_1, E_9$  and  $E_{11}$ . Five NOT-AND gate, in the form `NOT  $x$  AND  $y$` , are realised on electrodes  $E_2, E_9$  and  $E_{10}$ . The implementation of logical functions on the electrodes will allow for logical inference about geometries of pressure applied to insoles.

#### 4. Discussion

Initial testing of insoles made of other materials (not reported here) confirmed the necessity to use a material compatible with the biological organism being utilised. For example, off-the-shelf hemp insoles (sourced from six different manufacturers) showed poor fungal colonisation (possibly due to unknown chemical processes to minimise bacterial growth which could lead to undesirable foot wear odour). Further testing of bespoke insoles cut from non-woven hemp matting (manufactured by Pemmiproducts, Germany) showed improved colonisation by fungi but inconsistent electrical activity (possibly due to inconsistent moisture level) and weak mechanical robustness. Following a process of trial and error with different materials over several months, capillary matting was identified as a strong candidate for the desired functionality.

It was observed that the risk of unwanted bacterial infection during colonisation of the insole could be reduced by keeping the insole inside a sealed local environment (for example, plastic bag fitted with sub-micron air filter) that mitigates airborne infection. Additionally, enclosing in a bag helps to prevent the insole dehydrating by maintaining a high local air humidity. Keeping the insole in darkness or low intensity light encourages its colonisation.

Optionally, forming the insole from two sheets of capillary matting allows a sandwich to be formed with nutrient layer (such as Rye grain seeds) between the top and bottom layer. This can allow the fungi to remain active for longer. Insoles infused with flour paste were prone to infection (even with sterilisation via autoclave).

The large internal volume and porous seals (long fabric zips) on the growth tent containing test rig was prone to low humidity, even with an

open container of water present. It was found adding a sheet of capillary matting under the insole, see Fig. 2a, helped to maintain an adequate moisture level in the insole for fungal activity. The end of the sheet was left in a tray of de-ionised water which provided a source of moisture.

Oscillations in plant membrane are already known [10]. The physiological role of such oscillations has been the subject of much speculation. It has been hypothesised these oscillations are links to plants' adaptive response to environmental stresses [27].

The number of spikes ( $< 0.1$  mV) recorded over three  $\sim 30$  min periods before, during after even compressive load are summarised in Table 2. Further, it was observed that periodicity of electrical spikes changed when the mycelium was under compressive load.

Table 2: Electrical response to weight (electrical spikes  $< 0.1$  mV)

| <b>Differential channels</b> | 30 min period <b>before</b> weight | 30 min period <b>during</b> weight | 30 min period <b>after</b> weight |
|------------------------------|------------------------------------|------------------------------------|-----------------------------------|
| Ch 1- 2                      | 2                                  | 10                                 | 1                                 |
| Ch 3 - 4                     | 2                                  | 6                                  | 0                                 |
| Ch 7 - 8                     | 0                                  | 8                                  | 3                                 |
| Ch 9 - 10                    | 0                                  | 7                                  | 2                                 |

Measurements indicate a layer of mycelium integrated into an insole shows electrical response to mechanical stimulation with change in oscillatory activity. In particular, the number of spikes increases under compressive load. The response to removing weight is different to applying weight.

To examine this response in more detail, the distribution of the weight across the insole was varied and applied in different regions (i.e., toe, heel, whole). That was designed in order to be similar to the way people change their weight distribution from heel to toe while walking. The number of spikes in each time period were automatically counted by utilising SciPy, an open-source collection containing mathematical algorithms and functions built on an extension of Python (<https://docs.scipy.org>). In specific, the function *find\_peaks* was utilised to identify peaks with a prominence of  $0.03$  mV for this application. Then, a custom program was developed in Python to calculate the time difference between two spikes. Histograms of the distribution of time differences between spikes in each insole region under no

load, heel biased and toe biased load were produced and they were drawn over the same axes to allow the comparison of the results as shown in Fig. 10. Data visualization software Tableau was used to identify the potential (mV) differences under no load, even load, heel biased and toe biased load for every channel separately as shown in Fig. 11. The amplitude of spikes decreases under even load application compared to no load application. No conclusions could be made regarding the electrical activity under heel biased and toe biased load. It was therefore, not possible to accurately discern the distribution of compressive loading across the insole from analysis of electrical responses.

Experimentation identified the rate of occurrence of spikes is lower than desirable to accurately infer the weight bearing when walking. However, when standing for a period, electrical activity can be collected and analysed to infer weight bearing which can be used for anatomical diagnostics [11, 6]. Continuous monitoring of feet could offer numerous medical/health benefits [14, 33, 31]. For example, early detection of health related conditions (such as knee injury) or tiredness. It can also be useful for sports training [35, 29, 21].

In the experimental setup described, sensory mapping is limited to ‘1.5D’ (8 pairs of differential electrodes in a row and limited vertical motion) however this could be expanded to ‘2.5D’ by mapping with a 2D distributed array of electrodes across the insole. For example, needle electrodes replaced by thin/flexible wires integrated into the capillary matting such that uninsulated sections of the wires are spatially distributed and electrical connections are realised to the edge of the insole.

Direct conversion of mechanical energy into electricity offers potential as power source for various systems [28, 7, 32].

It was observed during the fabrication and testing of a diverse range of prototype wearables (including clothing) that capillary matting offer superior durability over hemp matting (in particular on flexible clothing joints, knees and elbows) and easy of interfacing to conventional fabrics (sewing and gluing). Therefore, capillary matting might be useful substrate for a range of smart fungal wearables.

Smart footwear offers benefits to safety footwear [12]. For example, automatic notification of injury to user and emergency services. Awareness of foot activity might also be beneficial in various environments such as driving (for example, enabling the vehicle to respond before the driver’s foot has touched a pedal).

Simulation using Fitzhugh-Nagumo model numerically illustrated how



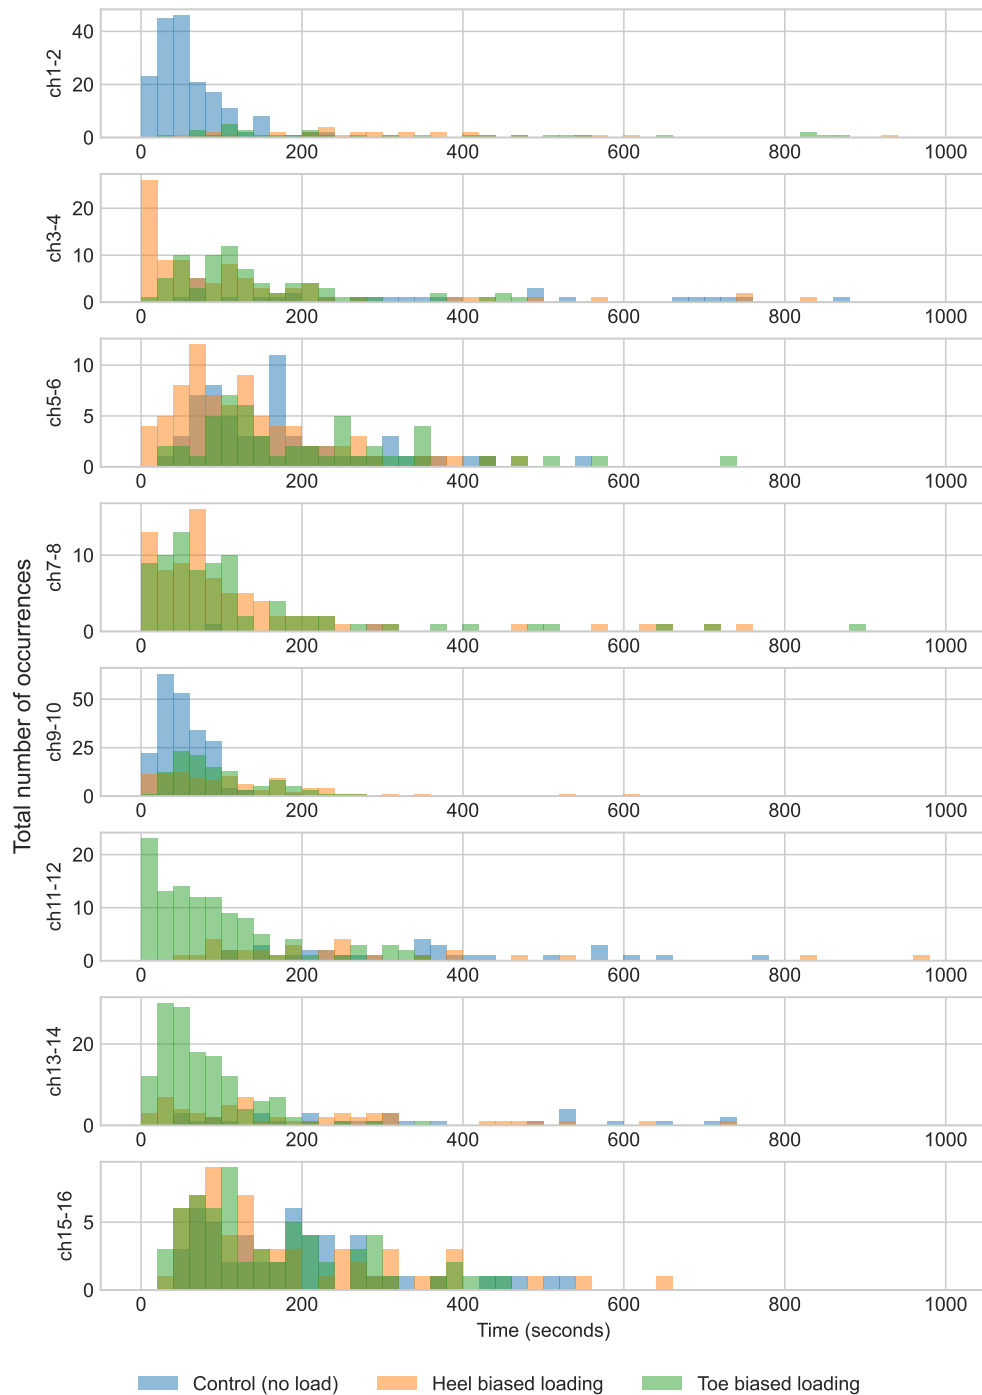

Figure 10: Histograms of the distribution of time differences between spikes in each insole region under a range of load condition.

Channel 1\_2 Sum of absolute differences of mV values

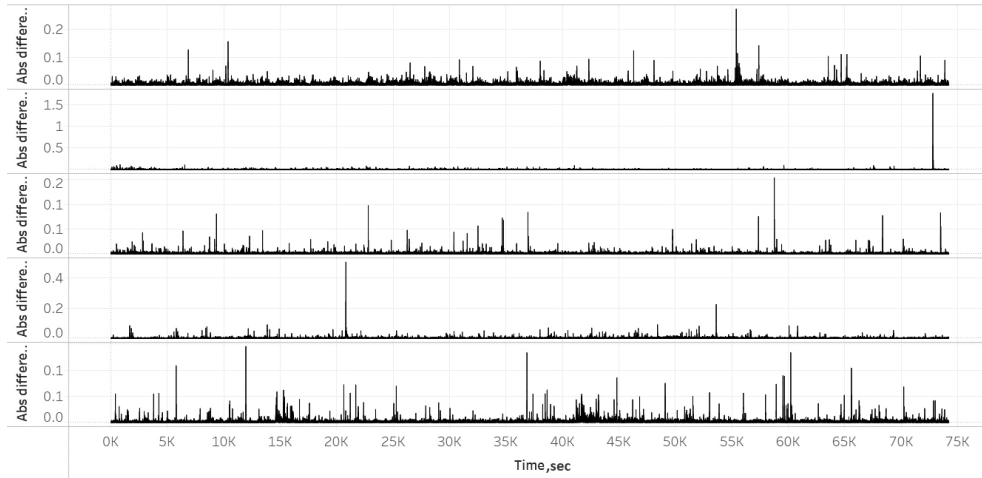

Channel 13\_14 Sum of absolute differences of mV values

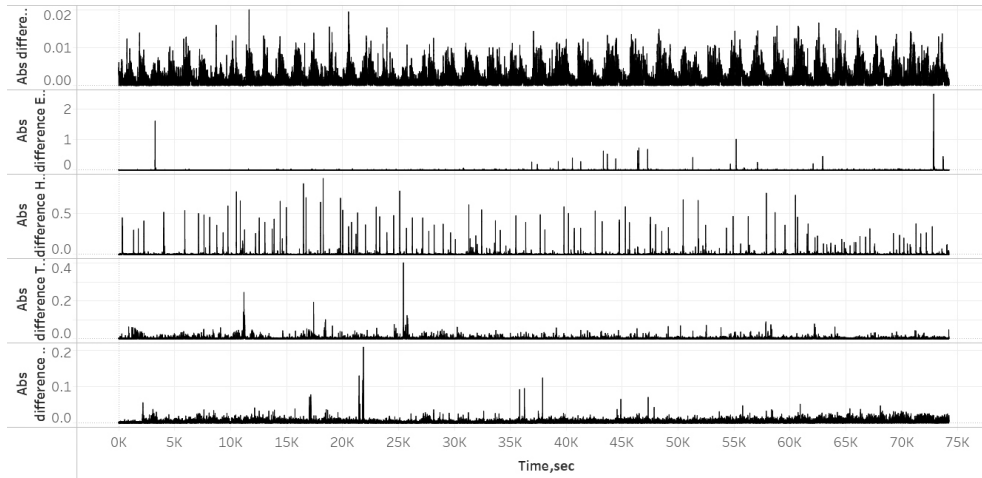

Figure 11: Graph showing decrease of amplitude when under even load compared to no load application for Channels 1-2 and 13-14.

excitation wave-fronts behave in a mycelium network colonising an insole and shown that it is possible to discern pressure points from the mycelium electrical activity.

## **5. Conclusions**

Electrical activity (spiking) was recorded in mycelium bound composites fabricated into insoles. The number and periodicity of electrical spikes change when the mycelium is subjected to compressive loading. We have shown that it might be possible to discern the loading from the electrical response of the fungi to stimuli. The results advance the development of intelligent sensing insoles which are a building block towards more generic reactive fungal wearables. Electrical activity changes in both spatial and temporal domains. Using Fitzhugh-Nagumo model we numerically illustrated how excitation wave-fronts behave in a mycelium network colonising an insole and shown that it might be possible to discern pressure points from the mycelium electrical activity. Fungal based insoles offer augmented functionality (sensory) and aesthetic (personal fashion).

## **6. Competing interests**

There are no competing interests to declare.

## **7. Data availability**

The datasets made and analysed during the current study are available from the corresponding author on reasonable request.

## **8. Author contributions**

AN and AA developed a concept. AN and NP undertook experiments and collection of data. AA developed the simulation using Fitzhugh-Nagumo model. All authors contributed to information processing and data analysis. All authors wrote the main manuscript text and prepared the figures. All authors reviewed the manuscript.

## 9. Acknowledgement

The research was supported by the funding from the European Union’s Horizon 2020 research and innovation programme FET OPEN “Challenging current thinking” under grant agreement No 858132. We are grateful to Ann Miller’s Speciality Mushrooms Ltd for information on their spawn.

## References

- [1] Andrew Adamatzky. Towards proteinoid computers. *arXiv preprint arXiv:2106.00883*, 2021.
- [2] Andrew Adamatzky and Antoni Gandia. Living mycelium composites discern weights via patterns of electrical activity. *Journal of Bioresources and Bioproducts*, 7(1):26–32, 2022.
- [3] Andrew Adamatzky, Florian Huber, and Jörg Schnauß. Computing on actin bundles network. *Scientific reports*, 9(1):1–10, 2019.
- [4] Andrew Adamatzky, Martin Tegelaar, Han AB Wosten, Anna L Powell, Alexander E Beasley, and Richard Mayne. On boolean gates in fungal colony. *Biosystems*, 193:104138, 2020.
- [5] Go W Beeler and H Reuter. Reconstruction of the action potential of ventricular myocardial fibres. *The Journal of physiology*, 268(1):177–210, 1977.
- [6] M. M. Cavanagh, P. R. and Rodgers. *Pressure Distribution Underneath the Human Foot*, pages 85–95. Springer Netherlands, Dordrecht, 1985.
- [7] Roberto de Fazio, Elisa Perrone, Ramiro Velázquez, Massimo De Vittorio, and Paolo Visconti. Development of a self-powered piezo-resistive smart insole equipped with low-power ble connectivity for remote gait monitoring. *Sensors*, 21(13), 2021.
- [8] Libo Gao et al. Highly sensitive pseudocapacitive iontronic pressure sensor with broad sensing range. *Nano-Micro Letters*, 13(1):1–14, 2021.
- [9] Richard FitzHugh. Impulses and physiological states in theoretical models of nerve membrane. *Biophysical journal*, 1(6):445–466, 1961.

- [10] Dieter Volkmann Frantisek Baluska, Stefano Mancuso, editor. *Oscillations in Plants*, bookTitle="Communication in Plants: Neuronal Aspects of Plant Life", pages 261–275. Springer Berlin Heidelberg, Berlin, Heidelberg, 2006.
- [11] Asok Kumar Ghosh, D.N. Tibarewala, P Mukherjee, S Chakraborty, and Dr Siddhartha Ganguli. Preliminary study on static weight distribution under the human foot as a measure of lower extremity disability. *Medical and biological engineering and computing*, 17:737–41, 12 1979.
- [12] D. Janson, S.T. Newman, and V. Dhokia. Next generation safety footwear. *Procedia Manufacturing*, 38:1668–1677, 2019. 29th International Conference on Flexible Automation and Intelligent Manufacturing ( FAIM 2019), June 24-28, 2019, Limerick, Ireland, Beyond Industry 4.0: Industrial Advances, Engineering Education and Intelligent Manufacturing.
- [13] I-Hung Khoo, Panadda Marayong, Vennila Krishnan, Michael Nico Balagtas, and Omar Rojas. Design of a biofeedback device for gait rehabilitation in post-stroke patients. In *2015 IEEE 58th international midwest symposium on circuits and systems (MWSCAS)*, pages 1–4. IEEE, 2015.
- [14] Feng Lin, Aosen Wang, Yan Zhuang, Machiko R. Tomita, and Wenyao Xu. Smart insole: A wearable sensor device for unobtrusive gait monitoring in daily life. *IEEE Transactions on Industrial Informatics*, 12(6):2281–2291, 2016.
- [15] Nurvv Ltd. NURVV Run Smart Insoles. <https://www.nurvv.com/en-gb/products/nurvv-run-insoles-trackers/>, 2022. [Online; accessed 18-Sept-2022].
- [16] Nurvv Ltd. NURVV Run Smart Insoles. <https://www.nurvv.com/en-gb/support/sizing/>, 2022. [Online; accessed 18-Sept-2022].
- [17] Nurvv Ltd. NURVV Run Smart Insoles operating time. <https://www.nurvv.com/en-gb/products/nurvv-run-insoles-trackers/>, 2022. [Online; accessed 18-Sept-2022].
- [18] Elena Martini, Tommaso Fiumalbi, Filippo Dell’Agnello, Zoran Ivanić, Marko Munih, Nicola Vitiello, and Simona Crea. Pressure-sensitive insoles for real-time gait-related applications. *Sensors*, 20(5):1448, 2020.

- [19] Mario Munoz-Organero, Jack Parker, Lauren Powell, and Susan Mawson. Assessing walking strategies using insole pressure sensors for stroke survivors. *Sensors*, 16(10):1631, 2016.
- [20] Jinichi Nagumo, Suguru Arimoto, and Shuji Yoshizawa. An active pulse transmission line simulating nerve axon. *Proceedings of the IRE*, 50(10):2061–2070, 1962.
- [21] Alexander Oks, Alexei Katashev, M. Zadinans, M. Rancans, and J. Litvak. Development of smart sock system for gait analysis and foot pressure control. In Efthyvoulos Kyriacou, Stelios Christofides, and Constantinos S. Pattichis, editors, *XIV Mediterranean Conference on Medical and Biological Engineering and Computing 2016*, pages 472–475, Cham, 2016. Springer International Publishing.
- [22] Junghoon Park, Youngjin Na, Gwangmin Gu, and Jung Kim. Flexible insole ground reaction force measurement shoes for jumping and running. In *2016 6th IEEE International Conference on Biomedical Robotics and Biomechatronics (BioRob)*, pages 1062–1067. IEEE, 2016.
- [23] Arkady M Pertsov, Jorge M Davidenko, Remy Salomonsz, William T Baxter, and Jose Jalife. Spiral waves of excitation underlie reentrant activity in isolated cardiac muscle. *Circulation research*, 72(3):631–650, 1993.
- [24] Julian Andres Ramirez-Bautista, Jorge Adalberto Huerta-Ruelas, Silvia Liliana Chaparro-Cárdenas, and Antonio Hernández-Zavala. A review in detection and monitoring gait disorders using in-shoe plantar measurement systems. *IEEE reviews in biomedical engineering*, 10:299–309, 2017.
- [25] Abdul Hadi Abdul Razak, Aladin Zayegh, Rezaul K Begg, and Yufridin Wahab. Foot plantar pressure measurement system: A review. *Sensors*, 12(7):9884–9912, 2012.
- [26] Jack M Rogers and Andrew D McCulloch. A collocation-Galerkin finite element model of cardiac action potential propagation. *IEEE Transactions on Biomedical Engineering*, 41(8):743–757, 1994.
- [27] Sergey Shabala, Lana Shabala, Dietrich Gradmann, Zhonghua Chen, Ian Newman, and Stefano Mancuso. Oscillations in plant membrane

- transport: model predictions, experimental validation, and physiological implications. *Journal of Experimental Botany*, 57(1):171–184, 12 2005.
- [28] Jianguo Sun, Huizhang Guo, Gian Nutal Schädli, Kunkun Tu, Styfen Schär, Francis W.M.R. Schwarze, Guido Panzarasa, Javier Ribera, and Ingo Burgert. Enhanced mechanical energy conversion with selectively decayed wood. *Science Advances*, 7(11):eabd9138, 2021.
- [29] Adin Ming Tan, Franz Konstantin Fuss, Yehuda Weizman, and Olga Troynikov. Development of a smart insole for medical and sports purposes. *Procedia Engineering*, 112:152–156, 2015. 'The Impact of Technology on Sport VI' 7th Asia-Pacific Congress on Sports Technology, APCST2015.
- [30] Juan Tao, Ming Dong, Li Li, Chunfeng Wang, Jing Li, Yue Liu, Rongrong Bao, and Caofeng Pan. Real-time pressure mapping smart insole system based on a controllable vertical pore dielectric layer. *Microsystems & Nanoengineering*, 6(1):62, August 2020.
- [31] Baitong Wang, Kuldeep Singh Rajput, Wing-Kin Tam, Anthony K. H. Tung, and Zhi Yang. Freewalker: a smart insole for longitudinal gait analysis. In *2015 37th Annual International Conference of the IEEE Engineering in Medicine and Biology Society (EMBC)*, pages 3723–3726, 2015.
- [32] Wei Wang, Junyi Cao, Jian Yu, Rong Liu, Chris R. Bowen, and Wei-Hsin Liao. Self-powered smart insole for monitoring human gait signals. *Sensors*, 19(24), 2019.
- [33] Wenyao Xu, Ming-Chun Huang, Navid Amini, Jason J. Liu, Lei He, and Majid Sarrafzadeh. Smart insole: A wearable system for gait analysis. In *Proceedings of the 5th International Conference on Pervasive Technologies Related to Assistive Environments, PETRA '12*, New York, NY, USA, 2012. Association for Computing Machinery.
- [34] Huanghe Zhang, Damiano Zanotto, and Sunil K Agrawal. Estimating cop trajectories and kinematic gait parameters in walking and running using instrumented insoles. *IEEE Robotics and Automation Letters*, 2(4):2159–2165, 2017.

- [35] Efthymios Ziagkas, Andreas Loukovitis, Dimitrios Xypolias Zekakos, Thomas Duc-Phu Chau, Alexandros Petrelis, and George Grouios. A novel tool for gait analysis: Validation study of the smart insole podosmart®. *Sensors*, 21(17), 2021.
